# Supplementary material for: Distinct Climate Effects on Dahurian Larch Growth at an Asian Temperate-Boreal Forest Ecotone and Nearby Boreal Sites
Source: MDPI journal article supplement (doi:10.3390/f13010027), 2021-12-26
Supplement: s1 [file s1]

Archive with 1 entries (1 files):
- forests-1498053-supplementary.pdf
