# Supplementary material for: Distinct Climate Effects on Dahurian Larch Growth at an Asian Temperate-Boreal Forest Ecotone and Nearby Boreal Sites
Source: MDPI journal article supplement (doi:10.3390/f13010027), 2021-12-26
Supplement: s1 [file s1 › forests-1498053-supplementary.pdf]

**Supplementary information** (Figures S1-S6; Tables S1-S3)

**Distinct climate effects on Dahurian larch growth at an Asian temperate-boreal forest  
ecotone and nearby boreal sites**

Enzai Du<sup>1, 2\*</sup>, Yang Tang<sup>2</sup>

<sup>1</sup>State Key Laboratory of Earth Surface Processes and Resource Ecology, Faculty of Geographical Science, Beijing Normal University, Beijing 100875, China

<sup>2</sup>School of Natural Resources, Faculty of Geographical Science, Beijing Normal University, Beijing 100875, China

\*Correspondence to: Enzai Du (enzaidu@bnu.edu.cn)

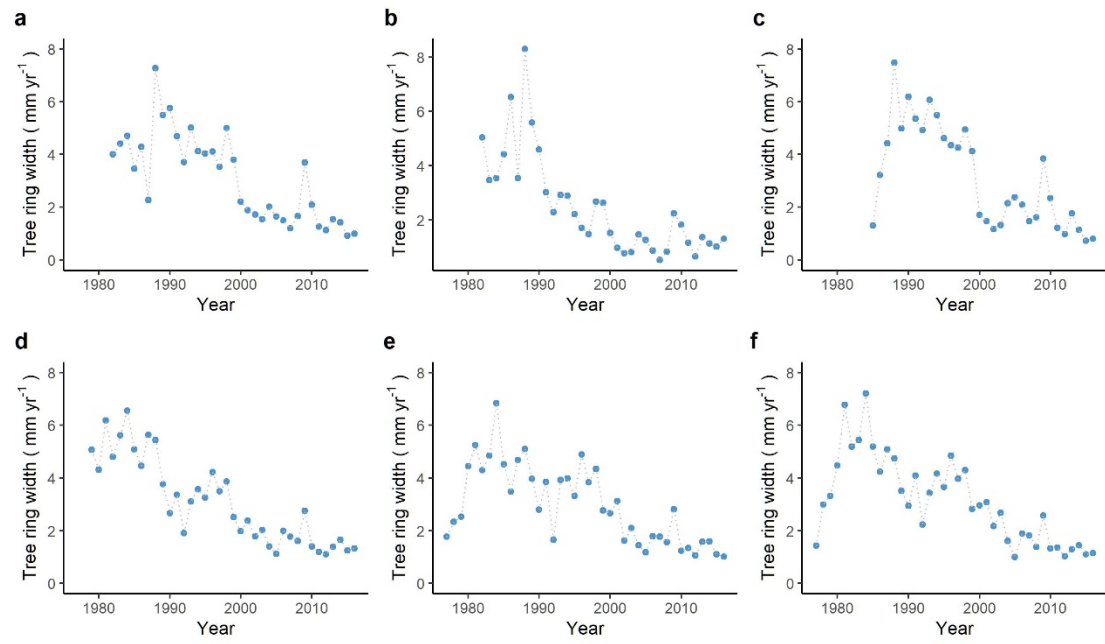

**Figure S1.** Temporal variations of crossdated tree ring width (mm yr<sup>-1</sup>) for the six Dahurian larch plantations at the southern boreal sites (a–c for stands 1–3) and the boreal-temperate forest ecotone (d–f for stands 4–6).

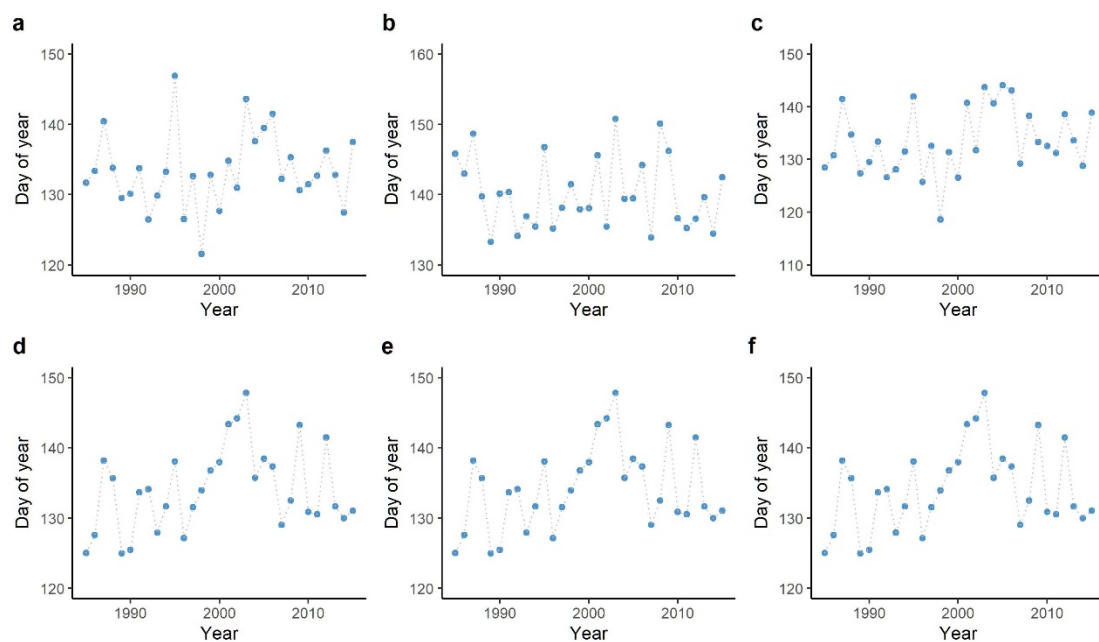

**Figure S2.** Three-decadal variations in satellite-derived beginning dates of growing season for the six Dahurian larch plantations at the southern boreal sites (a–c for stands 1–3) and the boreal-temperate forest ecotone (d–f for stands 4–6).

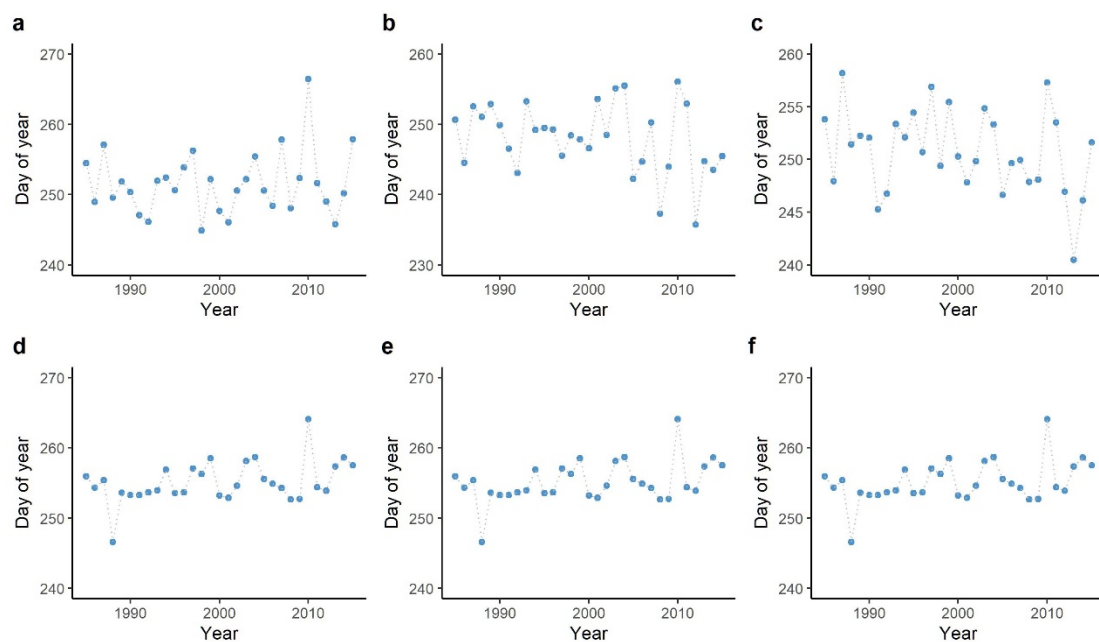

**Figure S3.** Three-decadal variations in satellite-derived ending dates of growing season for the six Dahurian larch plantations at the southern boreal sites (a–c for stands 1–3) and the boreal-temperate forest ecotone (d–f for stand 4–6).

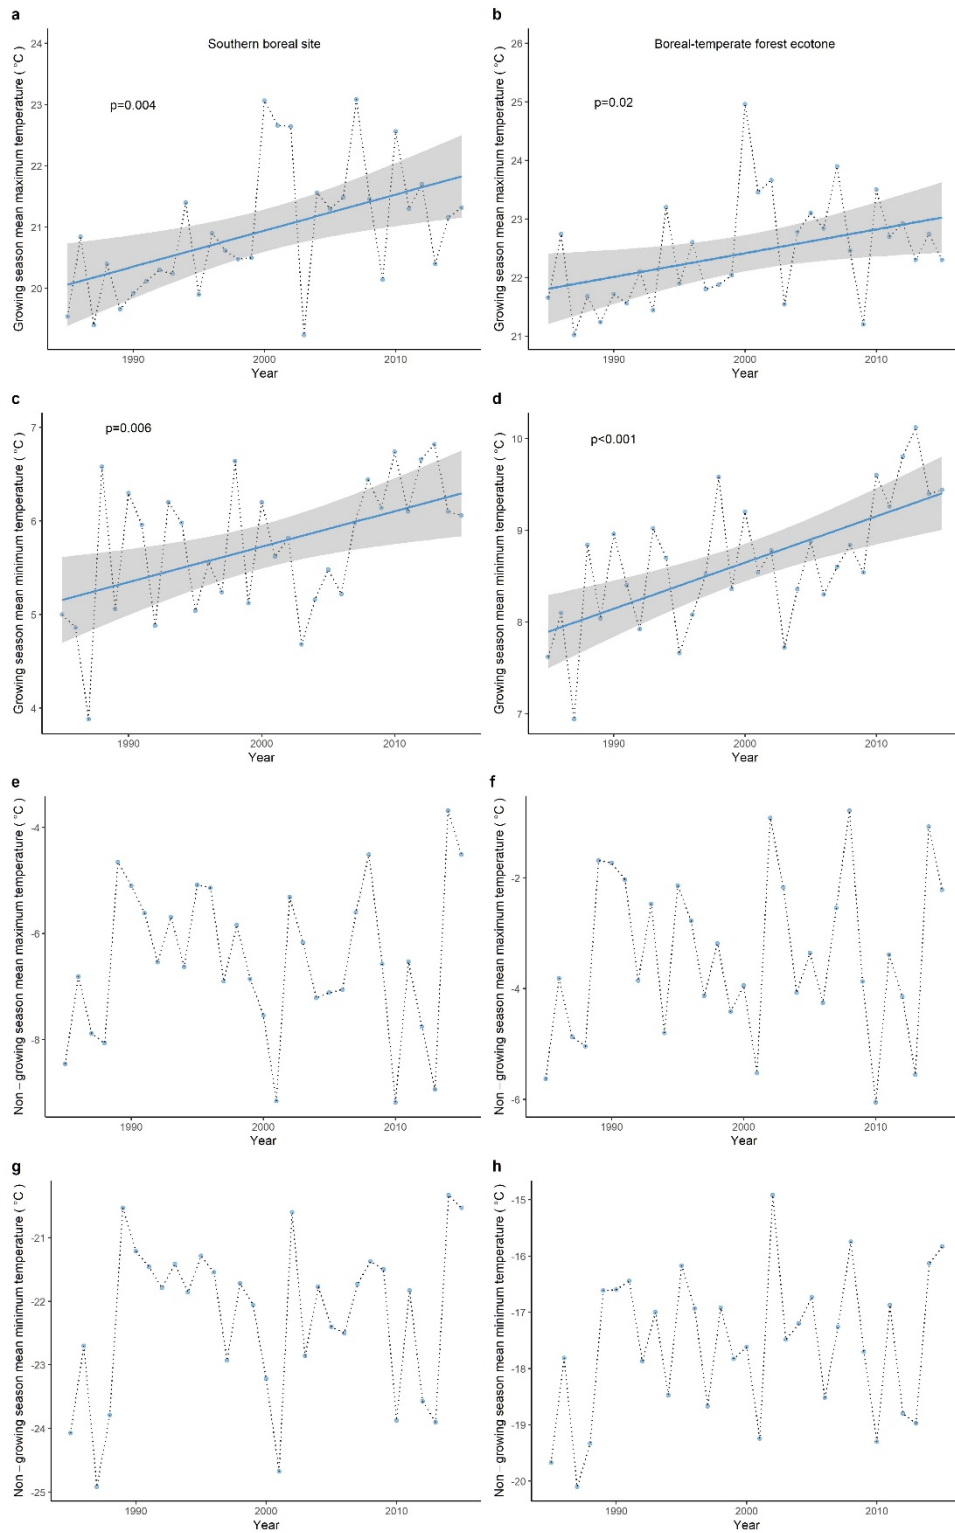

**Figure S4.** Three-decadal variations (1985–2015) of growing-season mean daytime maximum temperature (a, b), growing-season mean nighttime minimum temperature (c, d), non-growing-season mean daytime maximum temperature (e, f), and non-growing-season mean night minimum temperature (g, h) at the southern boreal sites and the boreal-temperate forest ecotone.

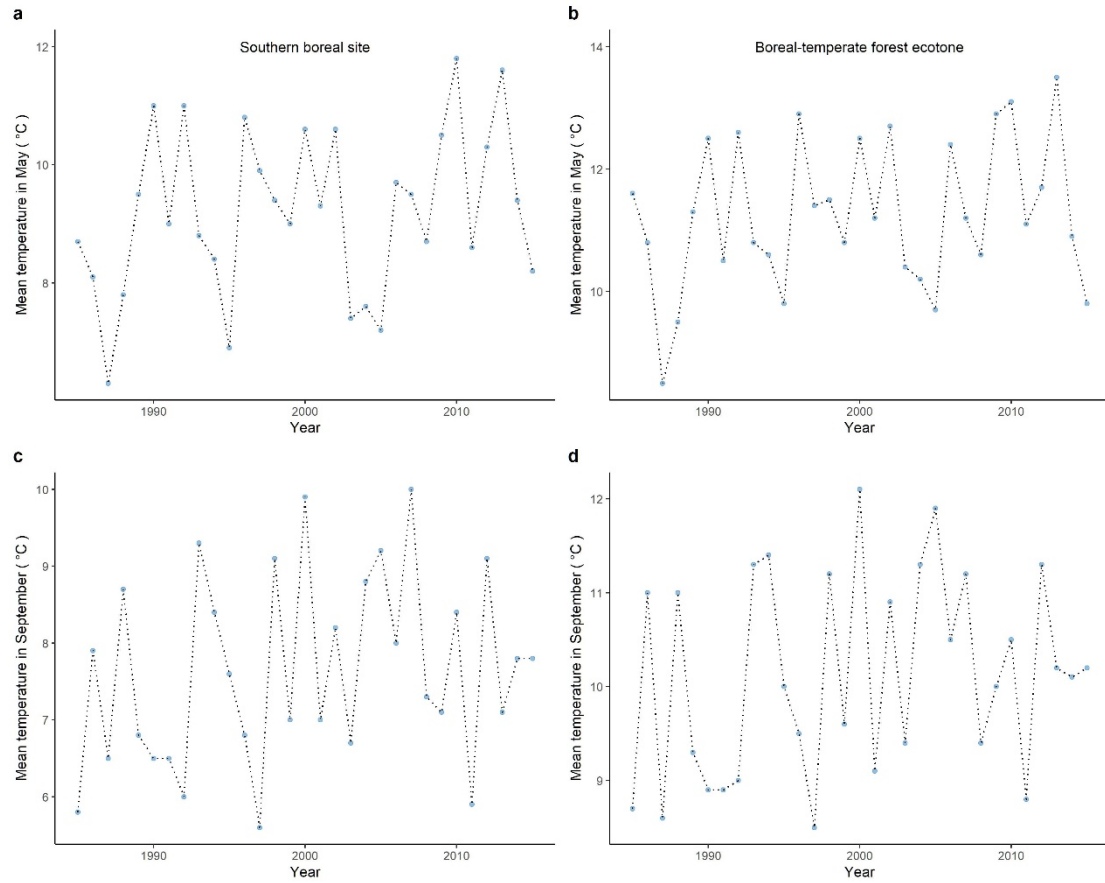

**Figure S5.** Three-decadal variations (1985–2015) of monthly mean temperature in May (a, b) and September (c, d) at the southern boreal sites and the boreal-temperate forest ecotone

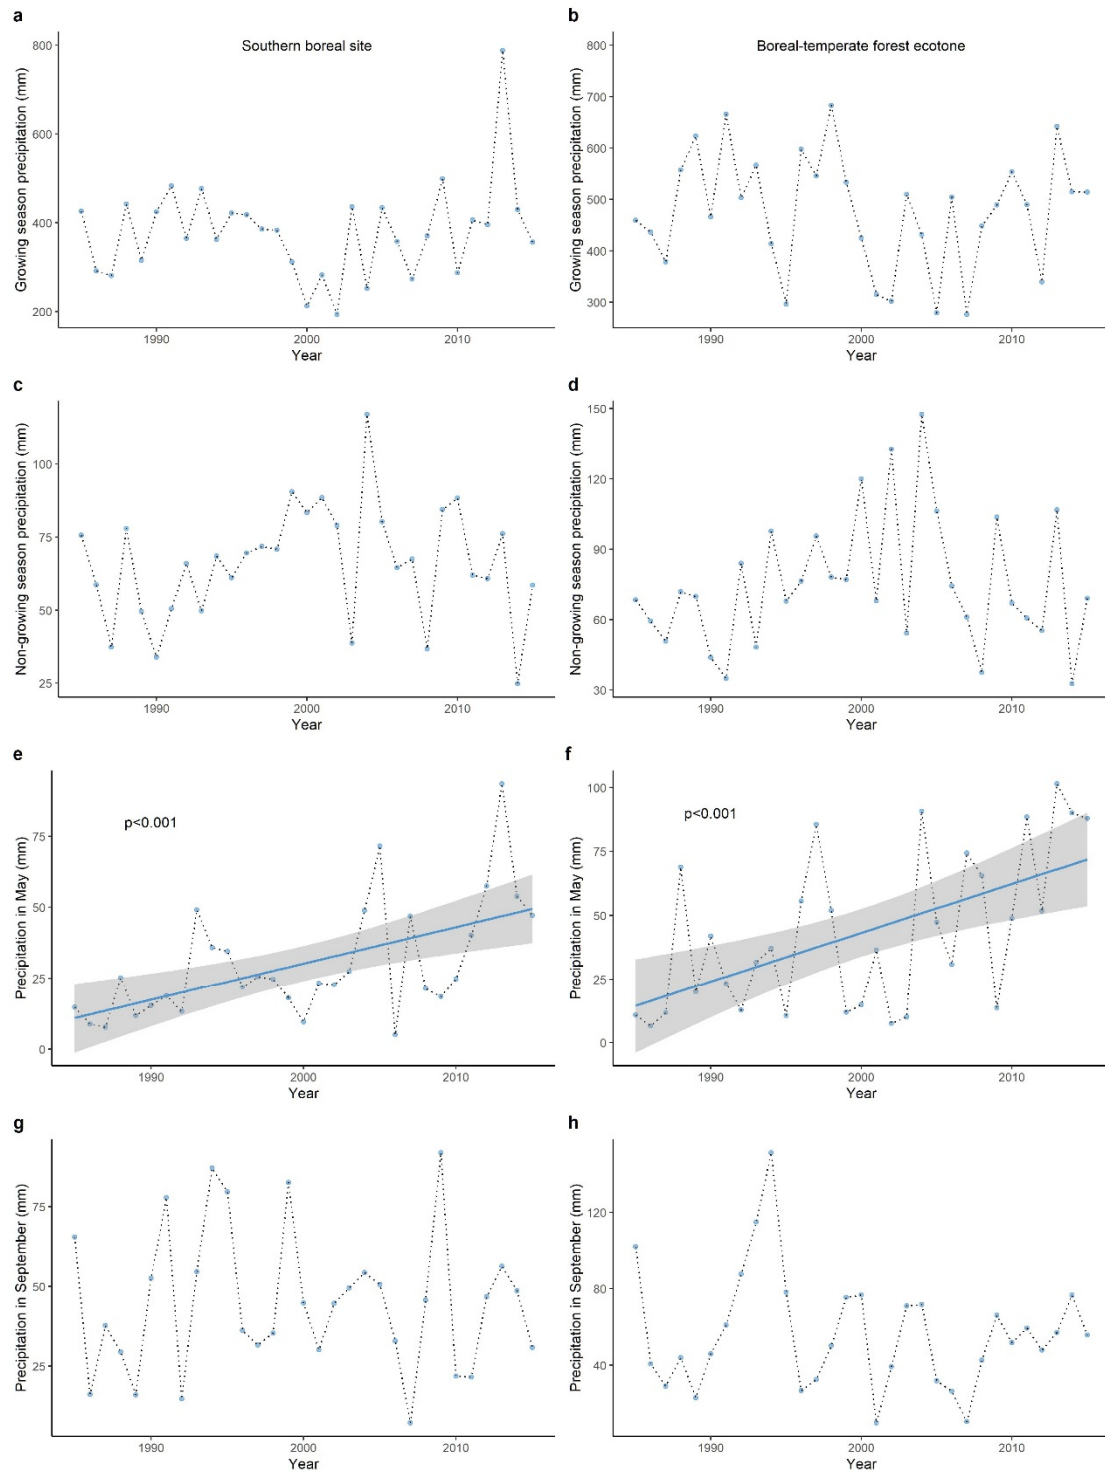

**Figure S6.** Three-decadal variations (1985–2015) of growing-season precipitation (a, b), non-growing-season precipitation (c, d), monthly precipitation in May (e, f) and September (g, h) at the southern boreal sites and the boreal-temperate forest ecotone.

**Table S1.** Soil nutrient concentrations of sampled Dahurian larch plantations at the southern boreal sites and the boreal-temperate forest ecotone. Values are shown as mean  $\pm$  standard deviation.

| Sites                           | Alkali-hydrolyzable N<br>(g kg <sup>-1</sup> ) | Total N<br>(g kg <sup>-1</sup> ) | Available P<br>(mg kg <sup>-1</sup> ) | Total P<br>(g kg <sup>-1</sup> ) | Total K<br>(g kg <sup>-1</sup> ) | Total Ca<br>(g kg <sup>-1</sup> ) | Total Mg<br>(g kg <sup>-1</sup> ) |
|---------------------------------|------------------------------------------------|----------------------------------|---------------------------------------|----------------------------------|----------------------------------|-----------------------------------|-----------------------------------|
| Southern boreal site            | 0.54 $\pm$ 0.25 <sup>a</sup>                   | 6.71 $\pm$ 2.43 <sup>a</sup>     | 13.7 $\pm$ 6.7 <sup>a</sup>           | 0.74 $\pm$ 0.06 <sup>a</sup>     | 20.7 $\pm$ 1.2 <sup>a</sup>      | 7.0 $\pm$ 2.5 <sup>a</sup>        | 4.0 $\pm$ 0.3 <sup>a</sup>        |
| Boreal-temperate forest ecotone | 0.79 $\pm$ 0.22 <sup>a</sup>                   | 6.57 $\pm$ 0.68 <sup>a</sup>     | 28.0 $\pm$ 9.1 <sup>a</sup>           | 0.74 $\pm$ 0.14 <sup>a</sup>     | 19.3 $\pm$ 1.7 <sup>a</sup>      | 9.3 $\pm$ 2.4 <sup>a</sup>        | 3.9 $\pm$ 0.7 <sup>a</sup>        |

**Table S2.** A summary of the model for the residual BAI of Dahurian larch at the southern boreal sites using growing-season mean nighttime minimum temperature (Tgromin), growing-season mean daytime maximum temperature (Tgromax), and non-growing-season precipitation (Pnongro) as important regulators (residual BAI ~ Tgromin + Tgromax + Pnongro). Variance inflation factors for Tgromin, Tgromax and Pnongro were 1.21, 1.45 and 1.22, respectively, implying inconsiderable collinearity among regulators.

| Coefficients | Estimate | Std. Error | t value | Pr(> t ) |
|--------------|----------|------------|---------|----------|
| Intercept    | 24.63352 | 5.41669    | 4.548   | ***      |
| Tgromin      | 2.94698  | 0.40857    | 7.213   | ***      |
| Tgromax      | -2.19550 | 0.30064    | -7.303  | ***      |
| Pnongro      | 0.06821  | 0.01483    | 4.599   | ***      |

Significance code: \*\*\* < 0.001.

Residual standard error: 2.521, Deviance explained 47.0%.

**Table S3.** A summary of the model for the residual BAI of Dahurian larch at the boreal-temperate forest ecotone using growing-season precipitation (Pgro) as the important regulator (residual BAI ~ Pgro).

| Coefficients | Estimate  | Std. Error | t value | Pr(> t ) |
|--------------|-----------|------------|---------|----------|
| Intercept    | -4.743470 | 1.559565   | -3.042  | **       |
| Pgro         | 0.009699  | 0.003189   | 3.042   | **       |

Significance code: \*\* <0.01.

Residual standard error: 3.421, Deviance explained 9.2%.
